# Supplementary material for: Qingda granule exerts neuroprotective effects against ischemia/reperfusion-induced cerebral injury via lncRNA GAS5/miR-137 signaling pathway
Source: PubMed Central journal article supplement (PMC7976574; doi:10.7150/ijms.53603), 2021-02-06
Supplement: ijmsv18p1687s1.pdf [file ijmsv18p1687s1.pdf]

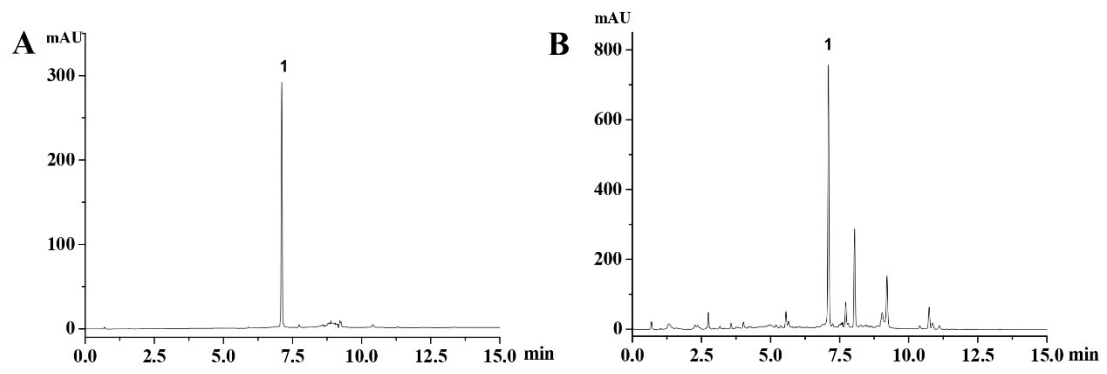

Figure S1. Chromatographic fingerprints of baicalin and QDG by UPLC. (A) 1-baicalin (B) QDG.
